# Supplementary material for: Cationic Peptides and Their Cu(II) and Ni(II) Complexes: Coordination and Biological Characteristics
Source: MDPI journal article supplement (doi:10.3390/ijms222112028), 2021-11-06
Supplement: s1 [file s1]

Supplementary Materials

**Cationic Peptides and their Cu(II) and Ni(II)  
Complexes: Coordination and Biological  
Characteristics**

Aleksandra Kotynia <sup>1,\*</sup>, Benita Wiatrak <sup>2</sup>, Wojciech Kamysz <sup>3</sup>, Damian Neubauer <sup>3</sup>, Paulina Jawien <sup>2,4</sup>  
and Aleksandra Marciniak <sup>1,\*</sup>

## Table of Contents

|                                                                                                 |     |
|-------------------------------------------------------------------------------------------------|-----|
| Table S1. MS data of the peptides: L1, L2, L3. ....                                             | S3  |
| Figure S2. Analytical HPLC data of peptide L1. ....                                             | S3  |
| Figure S3. Analytical HPLC data of peptide L2. ....                                             | S4  |
| Figure S4. FT-IR spectra for peptide L1. ....                                                   | S4  |
| Figure S5. FT-IR spectra for peptide L2. ....                                                   | S5  |
| Figure S6. FT-IR spectra for peptide L3. ....                                                   | S5  |
| Table S7. The UV-Vis and CD spectroscopic data for equimolar L1:Cu(II) system. ....             | S6  |
| Table S8. The UV-Vis and CD spectroscopic data for the equimolar L2:Cu(II) system. ....         | S7  |
| Table S9. The UV-Vis and CD spectroscopic data parameters for equimolar L3:Cu(II) system. ....  | S8  |
| Table S10. The UV-Vis and CD spectroscopic data for equimolar L1:Ni(II) system. ....            | S9  |
| Table S11. The UV-Vis and CD spectroscopic data for equimolar L2:Ni(II) system. ....            | S10 |
| Table S12. The UV-Vis and CD spectroscopic data parameters for equimolar L3:Ni(II) system. .... | S11 |

**Table S1.** MS data of the peptides L1 and L2, L3.

| Peptide | Structure                                           | z | m/z calc. | m/z exp. |
|---------|-----------------------------------------------------|---|-----------|----------|
| L1      | Lys-Dab-Dab-Gly-<br>Orn-Pro-His-Lys-<br>Arg-Lys-Dbt | 1 | 1234.83   | 1235.10  |
|         |                                                     | 2 | 617.92    | 618.42   |
| L2      | Lys-Dab-Ala-Gly-<br>Orn-Pro-His-Lys-<br>Arg         | 1 | 1007.62   | 1007.74  |
|         |                                                     | 2 | 504.31    | 504.58   |
|         |                                                     | 3 | 336.55    | 337.05   |
|         |                                                     | 4 | 252.66    | 253.31   |
| L3      | Lys-Dab-Dab-Gly-<br>Orn-Pro-Phe(2F)-<br>Lys-Arg     | 1 | 1063.64   | 1064.66  |
|         |                                                     | 2 | 532.82    | 532.83   |
|         |                                                     | 3 | 355.55    | 355.56   |

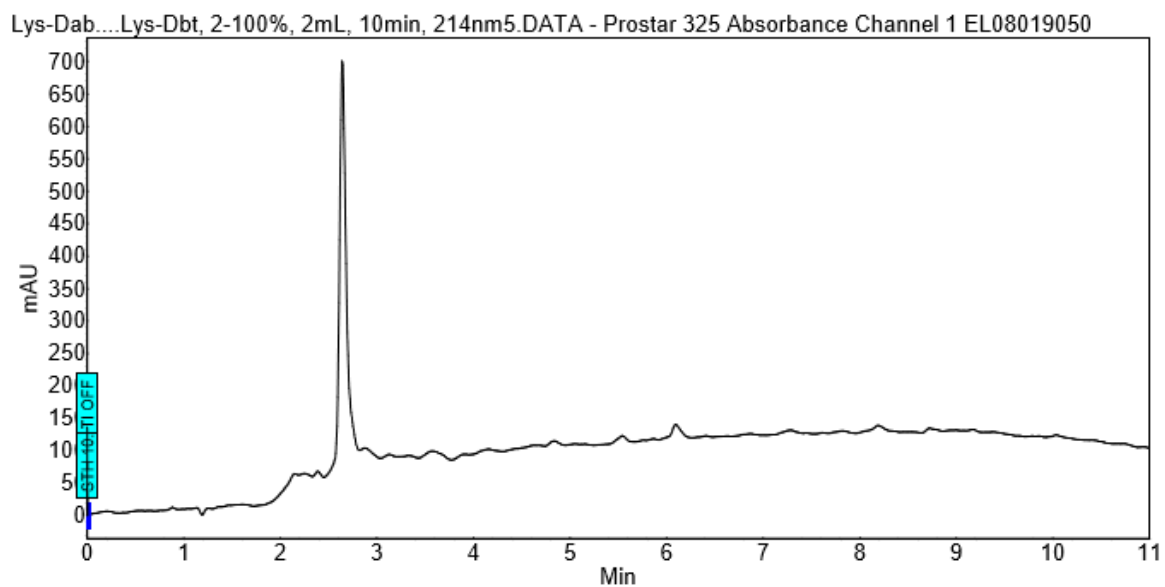**Figure S2.** Analytical HPLC data of peptide L1.

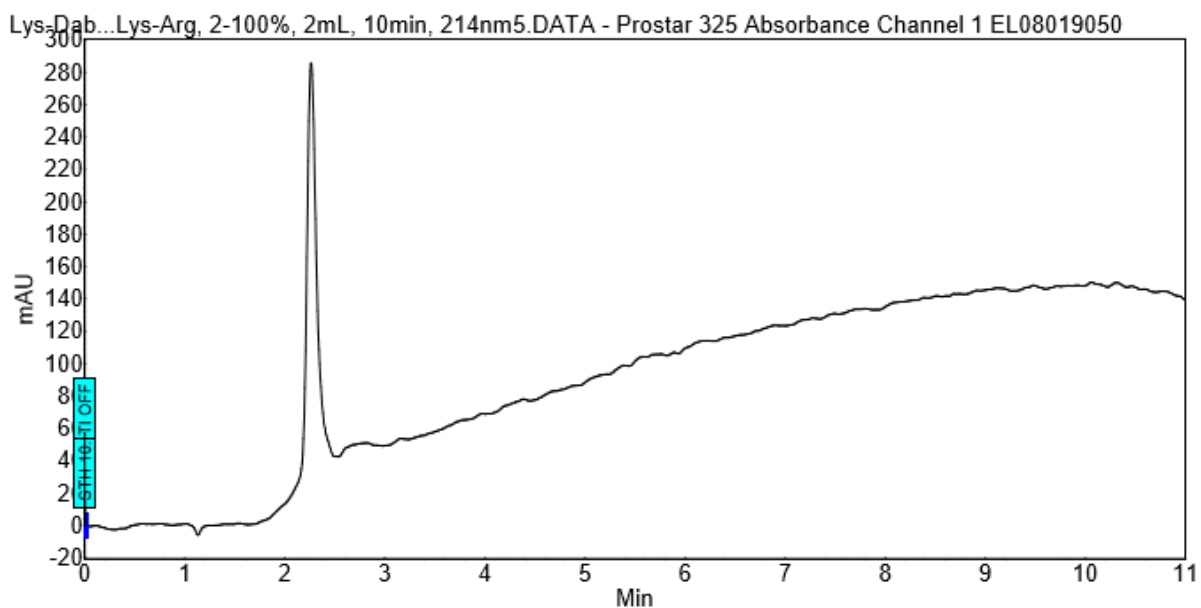

**Figure S3.** Analytical HPLC data of peptide L2.

The purity of the peptides was determined on a Varian ProStar HPLC system controlled by a Galaxie Chromatography Data System. Analyses were carried out on a Phenomenex Luna C18(2) column ( $4.6 \times 150$  mm, 110 Å pore size, 5  $\mu$ m particle size). The solvent systems used were: 0.1% aqueous TFA (A) and 0.1% TFA in acetonitrile (ACN) (B). The peptides were eluted with a linear gradient 2–100% B in A over 10 min at  $25 \pm 0.1$  °C. UV detection at 214 nm was used and the mobile phase flow rate was 2.0 mL/min.

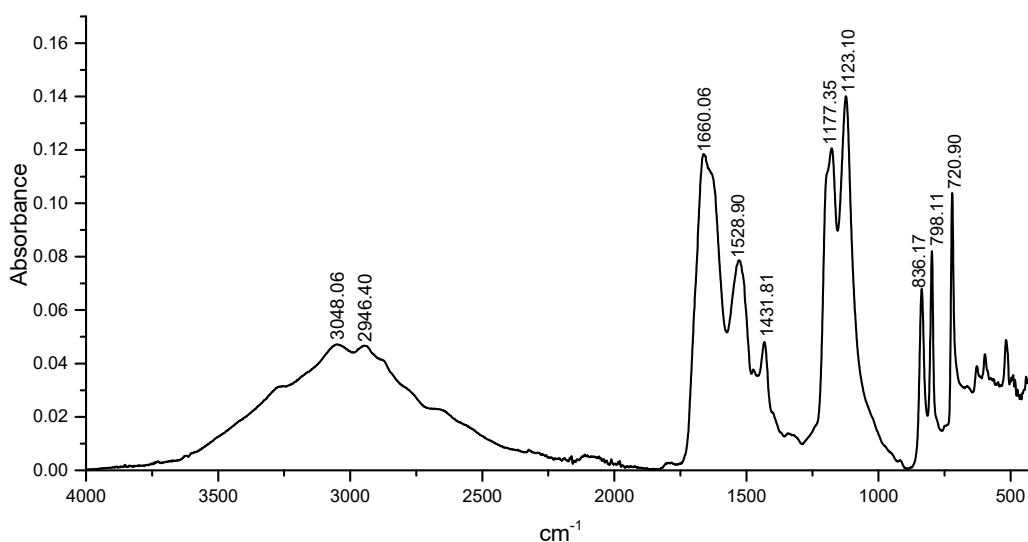

**Figure S4.** FT-IR spectra for peptide L1.

FT-IR (selected lines,  $\gamma_{\max}$ ,  $\text{cm}^{-1}$ ): 3048.06 (Amide B:  $\nu(\text{NH})$ ), 2946.40 (Amide B:  $\nu(\text{NH})$  and  $\nu\text{CH}$ ), 1660.06 (Amide I:  $\nu(\text{C=O})$ ), 1528 ( $\nu(\text{NH}_2)$ ), 1431.81 ( $\delta(\text{O=C-CH}_2)$ ), 1177.35 ( $\nu(\text{CN})$ ), 1123.10, 836.17, 798.11, 720.90 (fingerprint region).

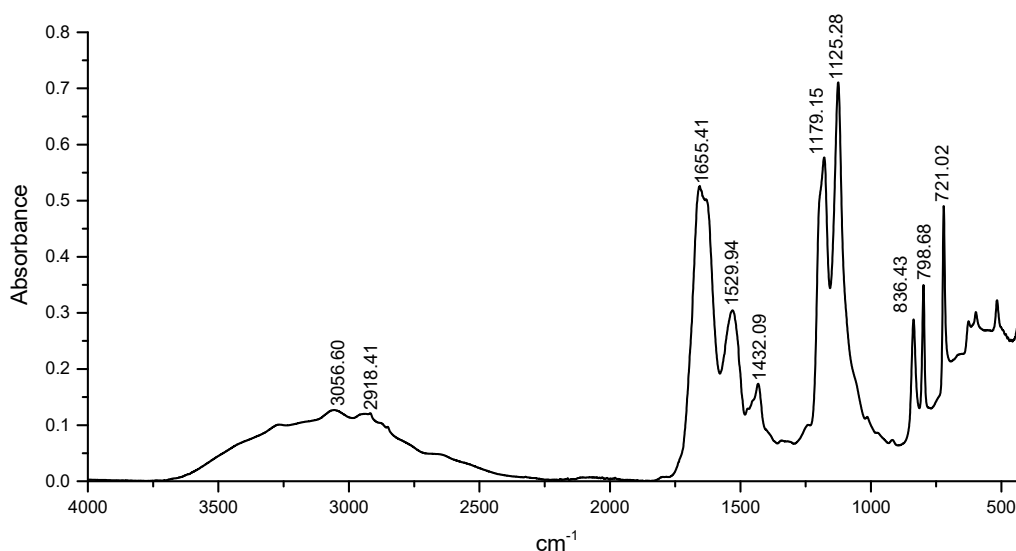

**Figure S5.** FT-IR spectra for peptide L2.

FT-IR (selected lines,  $\gamma_{\max}$ ,  $\text{cm}^{-1}$ ): 3056.60 (Amide B:  $\nu(\text{NH})$ ), 2918.41 (Amide B:  $\nu(\text{NH})$  and  $\nu\text{CH}$ ), 1655.41 (Amide I:  $\nu(\text{C}=\text{O})$ ), 1529.94 ( $\nu(\text{NH}_2)$ ), 1432.09 ( $\delta(\text{O}=\text{C}-\text{CH}_2)$ ), 1179.15 ( $\nu(\text{CN})$ ), 1125.28, 836.43, 798.68, 721.02 (fingerprint region).

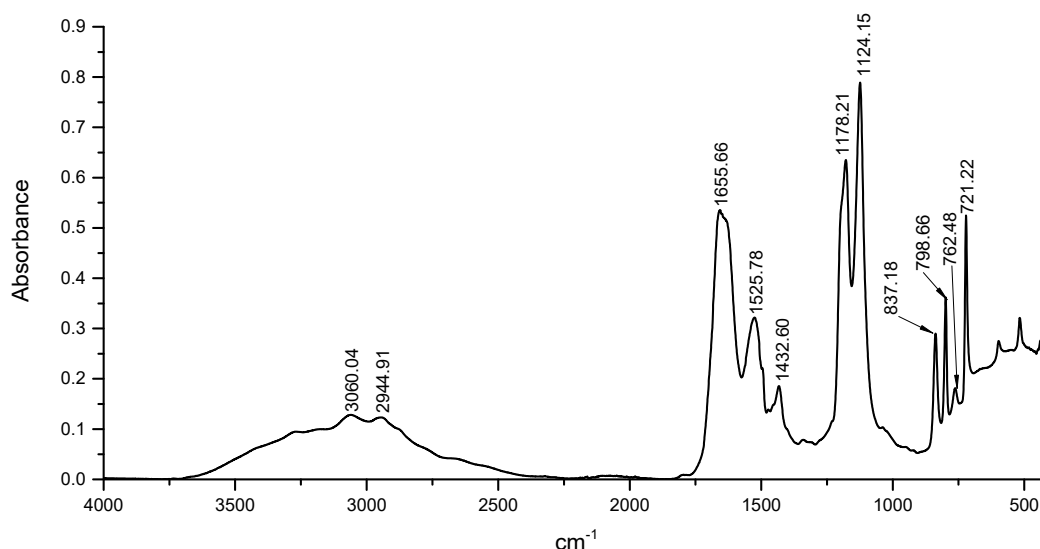

**Figure S6.** FT-IR spectra for peptide L3.

FT-IR (selected lines,  $\gamma_{\max}$ ,  $\text{cm}^{-1}$ ): 3060.04 (Amide B:  $\nu(\text{NH})$ ), 2944.91 (Amide B:  $\nu(\text{NH})$  and  $\nu\text{CH}$ ), 1655.66 (Amide I:  $\nu(\text{C}=\text{O})$ ), 1525.78 ( $\nu(\text{NH}_2)$ ), 1432.60 ( $\delta(\text{O}=\text{C}-\text{CH}_2)$ ), 1178.21 ( $\nu(\text{CN})$ ), 1124.15, 837.18, 798.66, 762.68 ( $\nu\text{Ar-F}$ ), 721.22 (fingerprint region).

Infrared spectra were recorded on Nicolet iS50 FTIR (Thermo Scientific) equipped with deuterated triglycine sulphate (DTGS) detector and KBr beam splitter. The spectral data were recorded within range of 4000 to 400  $\text{cm}^{-1}$  with resolution 4 $\text{cm}^{-1}$  and 64 scans were averaging. The spectra were obtained at room temperature, the powder sample of each peptides (L1, L2, L3) was applied on the crystal window and measured by using Attenuated Total Reflectance (ATR) method. The data analysis was proceeded by Omnic 9.3.30 (Thermo Fisher Scientific Inc.) software.

**Table S7.** The UV-Vis and CD spectroscopic data for equimolar L1:Cu(II) system.

| System                      | pH               | UV-Vis                                   |                                                   | CD                                       |                                                         |
|-----------------------------|------------------|------------------------------------------|---------------------------------------------------|------------------------------------------|---------------------------------------------------------|
|                             |                  | $\lambda$ [nm]                           | $\epsilon$<br>[M <sup>-1</sup> cm <sup>-1</sup> ] | $\lambda$ [nm]                           | $\Delta\epsilon$<br>[M <sup>-1</sup> cm <sup>-1</sup> ] |
| L1:Cu(II)                   | 4.55             | 570 <sup>a</sup>                         | 7.9                                               | 238 <sup>b</sup>                         | −0.68                                                   |
|                             |                  | 542 <sup>a</sup>                         | 57.7                                              | 553 <sup>a</sup>                         | −0.08                                                   |
|                             | 5.03             |                                          |                                                   | 480 <sup>a</sup>                         | 0.07                                                    |
|                             |                  |                                          |                                                   | 296 <sup>b</sup>                         | 0.60                                                    |
|                             |                  |                                          |                                                   | 250 <sup>b</sup>                         | −1.91                                                   |
|                             | 5.51             | 543 <sup>a</sup>                         | 68.3                                              | 553 <sup>a</sup>                         | −0.13                                                   |
|                             |                  |                                          |                                                   | 476 <sup>a</sup>                         | 0.10                                                    |
|                             |                  |                                          |                                                   | 297 <sup>b</sup>                         | 0.77                                                    |
|                             |                  |                                          |                                                   | 252 <sup>b</sup>                         | −2.05                                                   |
|                             | 6.08             | 533 <sup>a</sup>                         | 73.17                                             | 553 <sup>a</sup>                         | −0.19                                                   |
|                             |                  |                                          |                                                   | 479 <sup>a</sup>                         | 0.13                                                    |
|                             |                  |                                          |                                                   | 300 <sup>b</sup>                         | 0.92                                                    |
|                             |                  |                                          |                                                   | 256 <sup>b</sup>                         | −1.94                                                   |
|                             | 6.54             | 529 <sup>a</sup>                         | 78.3                                              | 553 <sup>a</sup>                         | −0.22                                                   |
|                             |                  |                                          |                                                   | 479 <sup>a</sup>                         | 0.14                                                    |
|                             |                  |                                          |                                                   | 301 <sup>b</sup>                         | 1.10                                                    |
|                             |                  |                                          |                                                   | 259 <sup>c</sup>                         | −2.21                                                   |
|                             | 7.13             | 553 <sup>a</sup>                         | 78.3                                              | 553 <sup>a</sup>                         | −0.28                                                   |
|                             |                  |                                          |                                                   | 479 <sup>a</sup>                         | 0.19                                                    |
|                             |                  |                                          |                                                   | 303 <sup>b</sup>                         | 1.36                                                    |
|                             |                  |                                          |                                                   | 264 <sup>c</sup>                         | −2.73                                                   |
|                             | 7.54             | 525 <sup>a</sup>                         | 78.3                                              | 553 <sup>a</sup>                         | −0.30                                                   |
|                             |                  |                                          |                                                   | 480 <sup>a</sup>                         | 0.19                                                    |
|                             |                  |                                          |                                                   | 303 <sup>b</sup>                         | 1.44                                                    |
|                             |                  |                                          |                                                   | 264 <sup>c</sup>                         | −2.93                                                   |
|                             | 8.07–10.51       | 524 <sup>a</sup>                         | 88.3                                              | 553 <sup>a</sup>                         | −0.30                                                   |
|                             |                  |                                          |                                                   | 480 <sup>a</sup>                         | 0.19                                                    |
|                             |                  |                                          |                                                   | 304 <sup>b</sup>                         | 1.50                                                    |
| 266 <sup>c</sup>            |                  |                                          |                                                   | −3.09                                    |                                                         |
| 11.04                       | 520 <sup>a</sup> | 91.6                                     | 553 <sup>a</sup>                                  | −0.30                                    |                                                         |
|                             |                  |                                          | 480 <sup>a</sup>                                  | 0.19                                     |                                                         |
|                             |                  |                                          | 304 <sup>b</sup>                                  | 1.50                                     |                                                         |
|                             |                  |                                          | 266 <sup>c</sup>                                  | −2.47                                    |                                                         |
| <sup>a</sup> d-d transition |                  | <sup>b</sup> NH <sub>2</sub> → Cu(II) CT |                                                   | <sup>c</sup> N <sup>−</sup> → Cu(II) CT. |                                                         |

**Table S8.** The UV-Vis and CD spectroscopic data for the equimolar L2:Cu(II) system.

| System                      | pH        | UV-Vis                                   |                                                   | CD                                                       |                                                         |
|-----------------------------|-----------|------------------------------------------|---------------------------------------------------|----------------------------------------------------------|---------------------------------------------------------|
|                             |           | $\lambda$ [nm]                           | $\epsilon$<br>[M <sup>-1</sup> cm <sup>-1</sup> ] | $\lambda$ [nm]                                           | $\Delta\epsilon$<br>[M <sup>-1</sup> cm <sup>-1</sup> ] |
| L2:Cu(II)                   | 5.02      | 605 <sup>a</sup>                         | 39                                                | 288 <sup>b</sup><br>245 <sup>c</sup>                     | 0.16<br>-1.27                                           |
|                             | 5.57      | 577 <sup>a</sup>                         | 70                                                | 277 <sup>b</sup><br>249 <sup>c</sup>                     | 0.60<br>-2.11                                           |
|                             | 6.18      | 560 <sup>a</sup>                         | 70                                                | 277 <sup>b</sup><br>249 <sup>c</sup>                     | 0.79<br>-2.38                                           |
|                             | 6.55–8.00 | 557 <sup>a</sup>                         | 74.5–82.5                                         | 277 <sup>b</sup><br>249 <sup>c</sup>                     | 1.10–1.18<br>-2.03–(-2.28)                              |
|                             | 8.57      | -                                        | -                                                 | 570 <sup>a</sup><br>277 <sup>b</sup><br>249 <sup>c</sup> | -0.14<br>0.94<br>-2.43                                  |
|                             | 9.00      | 552 <sup>a</sup>                         | 80.3                                              | 570 <sup>a</sup><br>277 <sup>b</sup><br>249 <sup>c</sup> | -0.13<br>1.11<br>-1.90                                  |
|                             | 9.52      | -                                        | -                                                 | 570 <sup>a</sup><br>277 <sup>b</sup><br>249 <sup>c</sup> | -0.13<br>0.94<br>-1.73                                  |
|                             | 10.08     | 544 <sup>a</sup>                         | 87.8                                              | 557 <sup>a</sup><br>277 <sup>b</sup><br>249 <sup>c</sup> | -0.18<br>0.94<br>-1.14                                  |
|                             | 10.52     | 532 <sup>a</sup>                         | 93.6                                              | 538 <sup>a</sup><br>280 <sup>b</sup><br>252 <sup>c</sup> | -0.36<br>0.68<br>-0.54                                  |
|                             | 11.00     | 518 <sup>a</sup>                         | 113.3                                             | 529 <sup>a</sup><br>300 <sup>b</sup><br>266 <sup>c</sup> | -0.77<br>0.30<br>-0.31                                  |
|                             | 11.56     | 509 <sup>a</sup>                         | 145.5                                             | 523 <sup>a</sup><br>303 <sup>b</sup><br>268 <sup>c</sup> | -1.38<br>0.55<br>-1.24                                  |
| <sup>a</sup> d-d transition |           | <sup>b</sup> NH <sub>2</sub> → Cu(II) CT |                                                   | <sup>c</sup> N <sup>-</sup> → Cu(II) CT.                 |                                                         |

**Table S9.** The UV-Vis and CD spectroscopic data parameters for equimolar L3:Cu(II) system.

| System                      | pH        | UV-Vis                                   |                                                   | CD                                       |                                                         |
|-----------------------------|-----------|------------------------------------------|---------------------------------------------------|------------------------------------------|---------------------------------------------------------|
|                             |           | $\lambda$ [nm]                           | $\epsilon$<br>[M <sup>-1</sup> cm <sup>-1</sup> ] | $\lambda$ [nm]                           | $\Delta\epsilon$<br>[M <sup>-1</sup> cm <sup>-1</sup> ] |
| L3:Cu(II)                   | 5.0       | 542 <sup>a</sup>                         | 43.6                                              | 300 <sup>b</sup>                         | 0.55                                                    |
|                             |           | 530 <sup>a</sup>                         | 86.9                                              | 558 <sup>a</sup>                         | -2.04                                                   |
|                             | 5.49      |                                          |                                                   | 475 <sup>a</sup>                         | 0.10                                                    |
|                             |           |                                          |                                                   | 301 <sup>b</sup>                         | 1.23                                                    |
|                             |           |                                          |                                                   | 265 <sup>c</sup>                         | -2.17                                                   |
|                             |           |                                          |                                                   |                                          |                                                         |
|                             | 6.19      | 525 <sup>a</sup>                         | 101.6                                             | 558 <sup>a</sup>                         | -0.32                                                   |
|                             |           |                                          |                                                   | 475 <sup>a</sup>                         | 0.14                                                    |
|                             |           |                                          |                                                   | 302 <sup>b</sup>                         | 1.49                                                    |
|                             |           |                                          |                                                   | 265 <sup>c</sup>                         | -2.80                                                   |
|                             | 6.63-7.45 | 523 <sup>a</sup>                         | 104.6-106.6                                       | 558 <sup>a</sup>                         | -0.35                                                   |
|                             |           |                                          |                                                   | 475 <sup>a</sup>                         | 0.18                                                    |
|                             |           |                                          |                                                   | 304 <sup>b</sup>                         | 1.59                                                    |
|                             |           |                                          |                                                   | 265 <sup>c</sup>                         | -3.04                                                   |
|                             | 8.04-9.50 | 525 <sup>a</sup>                         | 106.6                                             | 558 <sup>a</sup>                         | -0.37                                                   |
|                             |           |                                          |                                                   | 475 <sup>a</sup>                         | 0.18                                                    |
|                             |           |                                          |                                                   | 304 <sup>b</sup>                         | 1.61                                                    |
|                             |           |                                          |                                                   | 265 <sup>c</sup>                         | -2.82                                                   |
|                             | 10.0-11.0 | 520 <sup>a</sup>                         | 111.5                                             | 553 <sup>a</sup>                         | -0.39                                                   |
|                             |           |                                          |                                                   | 475 <sup>a</sup>                         | 0.197                                                   |
|                             |           |                                          |                                                   | 305 <sup>b</sup>                         | 1.67                                                    |
| 266 <sup>c</sup>            |           |                                          |                                                   | -2.43                                    |                                                         |
| <sup>a</sup> d-d transition |           | <sup>b</sup> NH <sub>2</sub> → Cu(II) CT |                                                   | <sup>c</sup> N <sup>-</sup> → Cu(II) CT. |                                                         |



**Table S10.** The UV-Vis and CD spectroscopic data for equimolar L1:Ni(II) system.

| System                      | pH         | UV-Vis                                   |                                                   | CD                                       |                                                         |
|-----------------------------|------------|------------------------------------------|---------------------------------------------------|------------------------------------------|---------------------------------------------------------|
|                             |            | $\lambda$ [nm]                           | $\epsilon$<br>[M <sup>-1</sup> cm <sup>-1</sup> ] | $\lambda$ [nm]                           | $\Delta\epsilon$<br>[M <sup>-1</sup> cm <sup>-1</sup> ] |
| L1:Ni(II)                   | 7.02       | 429 <sup>a</sup>                         | 62.5                                              | 477 <sup>a</sup>                         | -0.68                                                   |
|                             |            |                                          |                                                   | 417 <sup>a</sup>                         | 0.33                                                    |
|                             |            |                                          |                                                   | 258 <sup>c</sup>                         | 1.78                                                    |
|                             | 7.50       | 429 <sup>a</sup>                         | 94.9                                              | 477                                      | -1.16                                                   |
|                             |            |                                          |                                                   | 413                                      | 0.47                                                    |
|                             |            |                                          |                                                   | 258 <sup>c</sup>                         | 2.70                                                    |
|                             | 8.06       | 429 <sup>a</sup>                         | 104.9                                             | 475                                      | -1.35                                                   |
|                             |            |                                          |                                                   | 413                                      | 0.51                                                    |
|                             |            |                                          |                                                   | 258 <sup>c</sup>                         | 2.98                                                    |
|                             | 8.58–10.03 | 427 <sup>a</sup>                         | 107.8                                             | 475                                      | 1.41                                                    |
|                             |            |                                          |                                                   | 413                                      | 0.54                                                    |
|                             |            |                                          |                                                   | 258                                      | 3.04                                                    |
|                             | 10.52      | 426 <sup>a</sup>                         | 117.8                                             | 475                                      | 1.41                                                    |
|                             |            |                                          |                                                   | 413                                      | 0.40                                                    |
|                             |            |                                          |                                                   | 258                                      | 3.25                                                    |
|                             | 11.03      | 425 <sup>a</sup>                         | 122.5                                             | 472                                      | -1.54                                                   |
|                             |            |                                          |                                                   | 411                                      | 0.16                                                    |
|                             |            |                                          |                                                   | 258 <sup>c</sup>                         | 3.84                                                    |
| <sup>a</sup> d-d transition |            | <sup>b</sup> NH <sub>2</sub> → Ni(II) CT |                                                   | <sup>c</sup> N <sup>-</sup> → Ni(II) CT. |                                                         |

**Table S11.** The UV-Vis and CD spectroscopic data for equimolar L2:Ni(II) system.

| system                                                                                                                               | pH          | UV-Vis            |                                                   | CD               |                                                         |
|--------------------------------------------------------------------------------------------------------------------------------------|-------------|-------------------|---------------------------------------------------|------------------|---------------------------------------------------------|
|                                                                                                                                      |             | $\lambda$ [nm]    | $\epsilon$<br>[M <sup>-1</sup> cm <sup>-1</sup> ] | $\lambda$ [nm]   | $\Delta\epsilon$<br>[M <sup>-1</sup> cm <sup>-1</sup> ] |
| L2:Ni(II)                                                                                                                            | 7.0         | 450 <sup>a</sup>  | 35.7                                              | 497 <sup>a</sup> | -0.23                                                   |
|                                                                                                                                      |             |                   |                                                   | 440 <sup>a</sup> | 0.23                                                    |
|                                                                                                                                      |             |                   |                                                   | 260 <sup>c</sup> | 0.50                                                    |
|                                                                                                                                      |             |                   |                                                   | 239 <sup>b</sup> | -2.80                                                   |
|                                                                                                                                      | 7.59        | 448 <sup>a</sup>  | 72.0                                              | 497 <sup>a</sup> | -0.30                                                   |
|                                                                                                                                      |             |                   |                                                   | 440 <sup>a</sup> | 0.40                                                    |
|                                                                                                                                      |             |                   |                                                   | 260 <sup>c</sup> | -0.33                                                   |
|                                                                                                                                      |             |                   |                                                   | 239 <sup>b</sup> | -3.0                                                    |
|                                                                                                                                      | 8.07        | 448 <sup>a</sup>  | 82.6                                              | 497 <sup>a</sup> | -0.33                                                   |
|                                                                                                                                      |             |                   |                                                   | 435 <sup>a</sup> | 0.36                                                    |
|                                                                                                                                      |             |                   |                                                   | 260 <sup>c</sup> | 1.36                                                    |
|                                                                                                                                      |             |                   |                                                   | 239 <sup>b</sup> | -2.56                                                   |
|                                                                                                                                      | 8.55        | 448 <sup>a</sup>  | 88.1                                              | 491 <sup>a</sup> | -0.47                                                   |
|                                                                                                                                      |             |                   |                                                   | 435 <sup>a</sup> | 0.31                                                    |
|                                                                                                                                      |             |                   |                                                   | 260 <sup>c</sup> | 1.63                                                    |
|                                                                                                                                      |             |                   |                                                   | 239 <sup>b</sup> | -1.41                                                   |
|                                                                                                                                      | 9.17        | 444 <sup>a</sup>  | 94.5                                              | 485 <sup>a</sup> | -0.62                                                   |
|                                                                                                                                      |             |                   |                                                   | 435 <sup>a</sup> | 0.25                                                    |
|                                                                                                                                      |             |                   |                                                   | 260 <sup>c</sup> | 1.86                                                    |
|                                                                                                                                      | 9.54        | 435 <sup>a</sup>  | 102.5                                             | 486 <sup>a</sup> | -0.63                                                   |
|                                                                                                                                      |             |                   |                                                   | 435 <sup>a</sup> | 0.09                                                    |
|                                                                                                                                      |             |                   |                                                   | 260              | 2.40                                                    |
|                                                                                                                                      | 10.07       | 416 <sup>a</sup>  | 140.8                                             | 482 <sup>a</sup> | -1.0                                                    |
|                                                                                                                                      |             | 448 <sup>sh</sup> |                                                   | 260 <sup>c</sup> | 3.48                                                    |
|                                                                                                                                      | 10.54       | 408 <sup>a</sup>  | 210.6                                             | 468 <sup>a</sup> | -2.07                                                   |
|                                                                                                                                      |             |                   |                                                   | 268 <sup>c</sup> | 4.20                                                    |
|                                                                                                                                      | 11.04–11.50 | 408 <sup>a</sup>  | 227.0                                             | 460 <sup>a</sup> | -2.80                                                   |
|                                                                                                                                      |             |                   |                                                   | 271 <sup>c</sup> | 3.63                                                    |
| <sup>a</sup> d-d transition <sup>b</sup> NH <sub>2</sub> → Ni(II) CT <sup>c</sup> N <sup>-</sup> → Ni(II) CT <sup>sh</sup> shoulder. |             |                   |                                                   |                  |                                                         |

**Table S12.** The UV-Vis and CD spectroscopic data parameters for equimolar L3:Ni(II) system.

| System                      | pH         | UV-Vis                                   |                                                   | CD                                       |                                                         |
|-----------------------------|------------|------------------------------------------|---------------------------------------------------|------------------------------------------|---------------------------------------------------------|
|                             |            | $\lambda$ [nm]                           | $\epsilon$<br>[M <sup>-1</sup> cm <sup>-1</sup> ] | $\lambda$ [nm]                           | $\Delta\epsilon$<br>[M <sup>-1</sup> cm <sup>-1</sup> ] |
| L3:Ni(II)                   | 7.0        | 428 <sup>a</sup>                         | 41.6                                              | 473 <sup>a</sup>                         | −0.38                                                   |
|                             |            |                                          |                                                   | 409 <sup>a</sup>                         | 0.11                                                    |
|                             |            |                                          |                                                   | 258 <sup>c</sup>                         | 0.86                                                    |
|                             | 7.51       | 428 <sup>a</sup>                         | 106.7                                             | 473 <sup>a</sup>                         | −1.15                                                   |
|                             |            |                                          |                                                   | 409 <sup>a</sup>                         | 0.44                                                    |
|                             |            |                                          |                                                   | 258 <sup>c</sup>                         | 2.47                                                    |
|                             | 8.0        | 428 <sup>a</sup>                         | 121.7                                             | 473 <sup>a</sup>                         | −1.36                                                   |
|                             |            |                                          |                                                   | 409 <sup>a</sup>                         | 0.50                                                    |
|                             |            |                                          |                                                   | 258 <sup>c</sup>                         | −2.89                                                   |
|                             | 8.62–10.06 | 427 <sup>a</sup>                         | 125.8–135.2                                       | 472 <sup>a</sup>                         | −1.41                                                   |
|                             |            |                                          |                                                   | 409 <sup>a</sup>                         | 0.51                                                    |
|                             |            |                                          |                                                   | 258 <sup>c</sup>                         | 2.96                                                    |
|                             | 10.52      | 425 <sup>a</sup>                         | 135.3                                             | 472 <sup>a</sup>                         | −1.43                                                   |
|                             |            |                                          |                                                   | 409 <sup>a</sup>                         | 0.38                                                    |
|                             |            |                                          |                                                   | 259 <sup>c</sup>                         | 3.26                                                    |
|                             | 11.0       | 425 <sup>a</sup>                         | 137.2                                             | 471 <sup>a</sup>                         | −1.52                                                   |
|                             |            |                                          |                                                   | 409 <sup>a</sup>                         | 0.28                                                    |
|                             |            |                                          |                                                   | 259 <sup>c</sup>                         | 3.81                                                    |
| <sup>a</sup> d-d transition |            | <sup>b</sup> NH <sub>2</sub> → Ni(II) CT |                                                   | <sup>c</sup> N <sup>−</sup> → Ni(II) CT. |                                                         |
